# Supplementary material
Source: PubMed Central journal article supplement (PMC7520426)

# Supplementary Figure 1

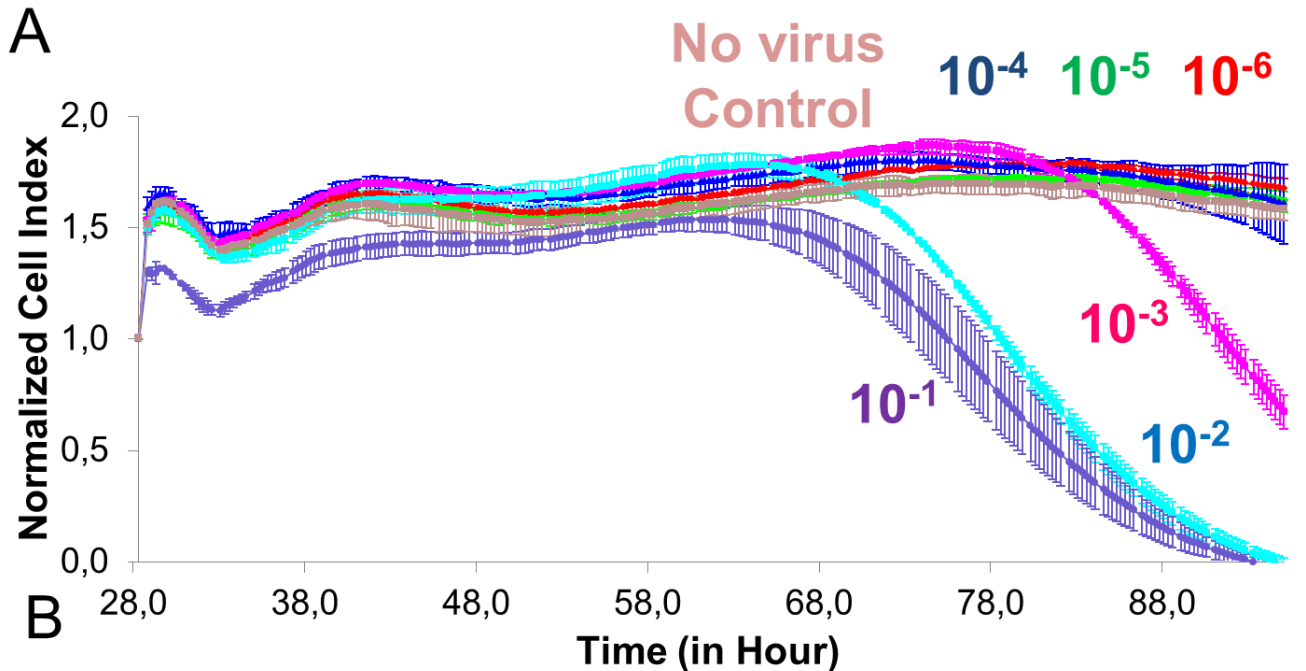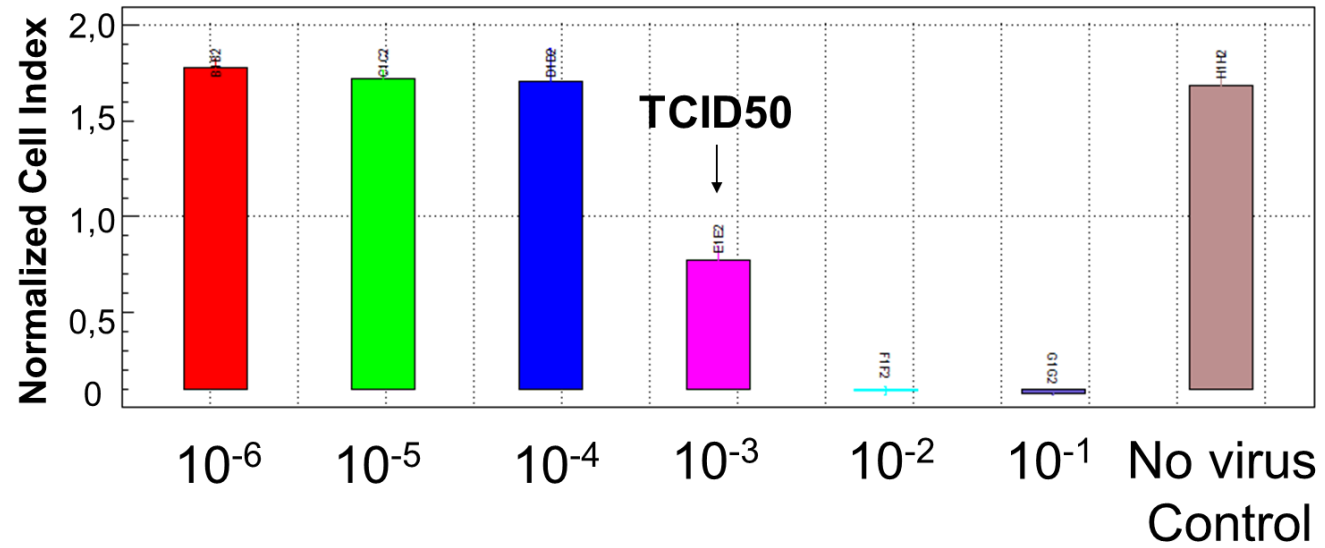

# Supplementary Figure 2

**A**

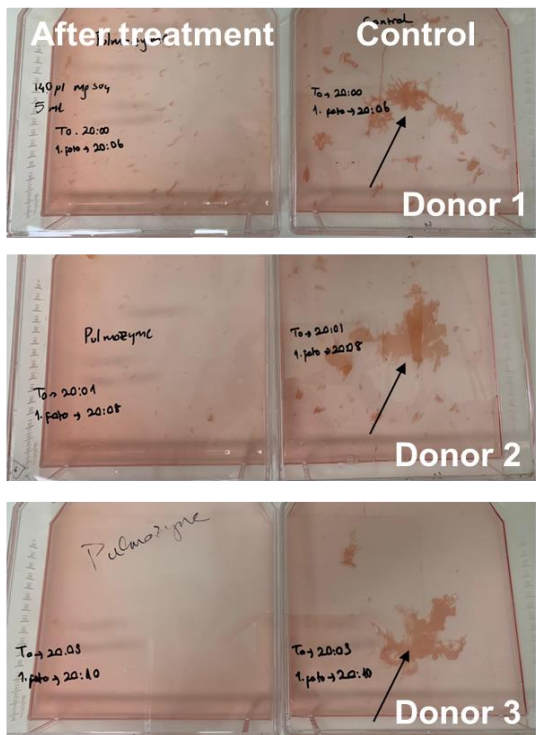

**B**

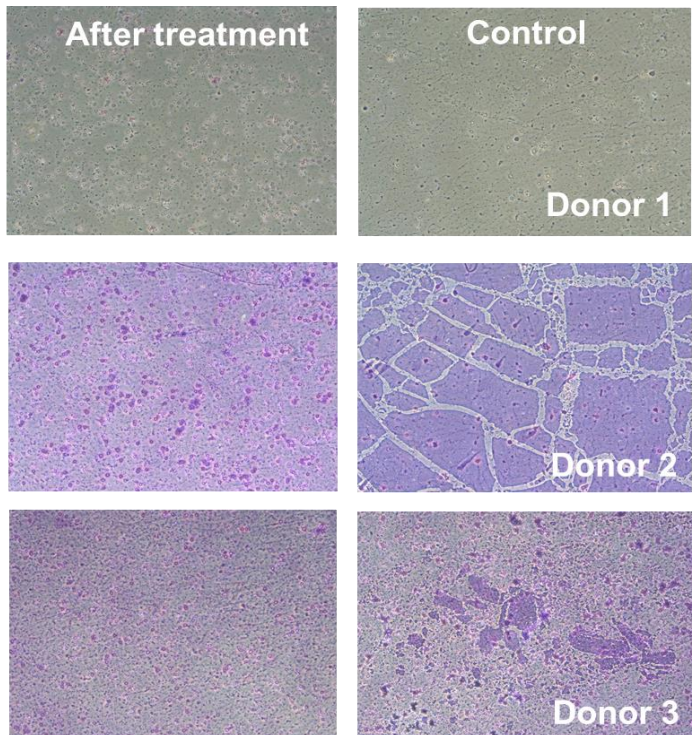

**C**

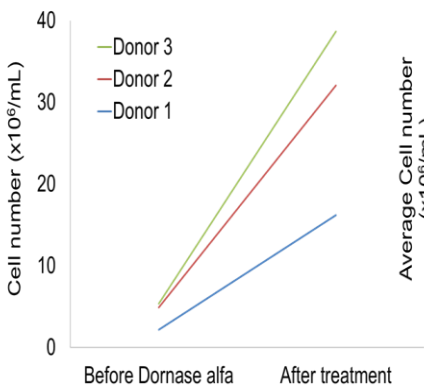

**D**

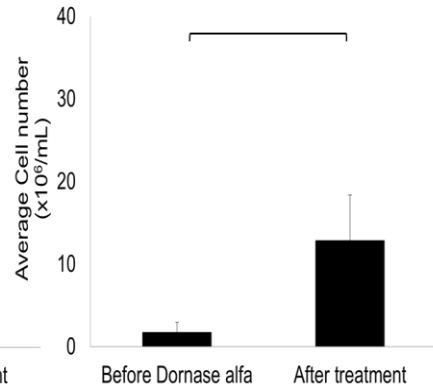

**E**

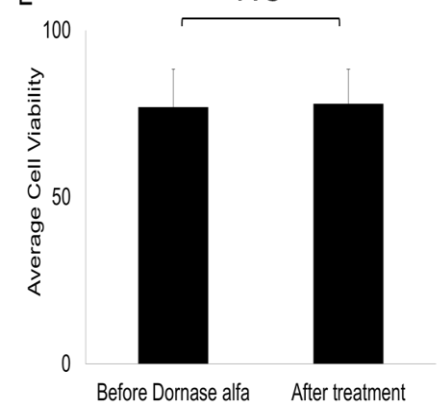

Supplement: mmc1.pdf [file mmc1.pdf]
